1 **A neural network model for the evolution of learning in changing**  
2 **environments**

3

4 Magdalena Kozielska<sup>1\*</sup> and Franz J. Weissing<sup>1†</sup>

5

6 Affiliations:

7 <sup>1</sup> Groningen Institute for Evolutionary Life Sciences, University of Groningen, Groningen, The

8 Netherlands

9

10 \* [m.a.kozielska@rug.nl](mailto:m.a.kozielska@rug.nl)

11 † [f.j.weissing@rug.nl](mailto:f.j.weissing@rug.nl)

## 12 **Abstract**

13 The ability to learn from past experience is an important adaptation, but how natural selection shapes  
14 learning is not well understood. Here, we present a novel way of modelling learning using small neural  
15 networks and a simple, biology-inspired learning algorithm. Learning affects only part of the network,  
16 and it is governed by the difference between expectations and reality. We used this model to study the  
17 evolution of learning under various environmental conditions and different scenarios for the trade-off  
18 between exploration (learning) and exploitation (foraging). Efficient learning regularly evolved in our  
19 individual-based simulations. However, in line with previous studies, the evolution of learning was less  
20 likely in relatively constant environments (where genetic adaptation alone can lead to efficient foraging)  
21 or in the case of short-lived organisms (that cannot afford to spend much of their lifetime on exploration).  
22 Once learning did evolve, the characteristics of the learning strategy (the duration of the learning period  
23 and the learning rate) and the average performance after learning were surprisingly little affected by the  
24 frequency and/or magnitude of environmental change. In contrast, an organism's lifespan and the  
25 distribution of resources in the environment had a strong effect on the evolved learning strategy.  
26 Interestingly, a longer learning period did not always lead to better performance, indicating that the  
27 evolved neural networks differ in the effectiveness of learning. Overall, however, we showed that a  
28 biologically inspired, yet relatively simple, learning mechanism can evolve to lead to an efficient  
29 adaptation in a changing environment.

30

## 31 **Author Summary**

32 The ability to learn from experience is an important adaptation. However, it is still unclear how learning  
33 is shaped by natural selection. Here, we present a novel way of modelling the evolution of learning using  
34 small neural networks and a simple, biology-inspired learning mechanism. Computer simulations reveal  
35 that efficient learning readily evolves in this model. However, the evolution of learning is less likely in  
36 relatively constant environments (where evolved inborn preferences can guide animal behaviour) and in  
37 short-lived organisms (that cannot afford to spend much of their lifetime on learning). If learning does

38 evolve, the evolved learning strategy is strongly affected by the lifespan and environmental richness but  
39 surprisingly little by the rate and degree of environmental change. In summary, we show that a simple  
40 and biologically plausible mechanism can help understand the evolution of learning and the structure of  
41 the evolved learning strategies.

42

## 43 **Introduction**

44 Learning can be defined as a change in the nervous system manifested as altered behaviour due to  
45 experience [1]. The ability to learn is widespread in the animal kingdom as it is an important adaptation  
46 to life in complex environments [2–5]. Learning has been studied extensively in different fields, like  
47 psychology, ethology, neurobiology, and more recently artificial intelligence. A number of theoretical  
48 studies have been conducted in order to understand the evolution of learning but many questions still  
49 remind unanswered [6].

50 The limited progress may be related to the fact that only a few evolution-oriented theoretical studies  
51 considered that experience-based changes in behaviour are achieved via changes in neural networks.  
52 Many studies take a behavioural-gambit approach [7], assuming that mechanisms do not matter and that  
53 evolution will always shape learning in such a way that the outcome is optimal. Modelling studies that  
54 do take mechanisms into consideration, typically focus on the evolution of simple learning rules that are  
55 determined by a small number of parameters (e.g. [8–13] but see [14]). It is difficult to imagine how  
56 such rules could emerge via the evolution of brain plasticity.

57 In contrast, machine learning and artificial intelligence deal with complex neural networks capable of  
58 learning. However, the proposed learning mechanisms often rely on complicated algorithms, such as  
59 backpropagation, which affect all connections in the network [15,16]. Such techniques are very efficient  
60 in machine learning applications but are far removed from biological reality [17]. Additionally, when  
61 evolutionary considerations are included, they are usually limited to network optimisation instead of  
62 asking evolutionary questions (but see [18,19]). Mutation and selection are usually viewed as useful  
63 tools that can be freely designed to achieve a computationally efficient outcome and often unrealistic  
64 assumptions are made about the way how natural selection works [20–22].

65 Here, we take a first step toward filling the gap between these two approaches. We study the evolution  
66 of neural networks that are capable of learning via a simple but plausible mechanism. In our model,  
67 neural networks can change over the generations through evolution by natural selection, but also through  
68 learning within the lifetime of an individual. Experience-induced changes in the network are localized  
69 and affect only a small number of neural connections – an approach inspired by “reservoir computing”  
70 [23,24]. The learning mechanism is based on prediction error, the difference between an animal’s  
71 expectation and observed reality. Such a mechanism is biologically plausible, as prediction errors are  
72 signalled by the neurotransmitter dopamine, which is ascribed an important role in learning [25,26].  
73 Learning algorithms based on error prediction have also been successfully implemented in machine  
74 learning applications [23]. To our knowledge, this is the first time that such a biology-inspired local  
75 learning mechanism is implemented in a study on the evolution of learning. Yet, we would like to stress  
76 that it is not our goal to build a realistic model of a brain. Rather, we view our model as a conceptual  
77 tool to explore how the addition of mechanistic detail affects the evolution of learning.

78 Learning theory predicts that the degree of environmental change affects the adaptive value of learning  
79 and therefore the probability that learning evolves [6]. Generally speaking, learning is expected to be  
80 most advantageous for moderate rates of environmental change [27]. If there is little or no change,  
81 genetic control of behaviour should evolve. Learning is also not profitable if the change is too frequent  
82 because information on the environment gets outdated too fast. We therefore study the evolution of  
83 neural networks and their learning mechanisms in different regimes of frequency and magnitude of  
84 environmental change, as it allows us to investigate whether a more mechanistic implementation of  
85 learning is in line with the predictions of “mechanism-free” theory.

86 We also touch upon a rarely studied aspect of learning theory – the effect of lifespan on the evolution  
87 of learning. As far as we know there are only two studies addressing this question [28,29]. These models  
88 are vastly different from each other in assumptions and ecological context and lead to different  
89 predictions on whether the investment in learning should be highest for shorter or longer lifespans. To  
90 add to this limited body of knowledge, we also study how different lifespans affect the evolution of  
91 learning and the evolved learning strategy.

92 Our simulation study addresses the following research questions: Under which environmental conditions  
93 does learning evolve? What is the evolved learning strategy and how efficient is it? What is the effect  
94 of lifespan on the evolved learning strategy?

95

## 96 **Methods**

### 97 **Model overview**

98 We used individual-based simulations to study the evolution of simple neural networks that are able to  
99 adapt to changing environment by learning.

100 In our model, individuals harbour a neural network that guides their foraging decisions. Individuals have  
101 a fixed lifetime of a given number of timesteps. At the start of their life, they can spend a number of  
102 timesteps on learning. During this learning period, they gather information about the quality (energy  
103 content) of food items in their environment, and they use this information to adjust their neural network.  
104 After the learning period, individuals switch to foraging, when they use their network to assess the  
105 available foraging options. They choose the food item their neural network finds the most profitable,  
106 consume it and gain energy equal to its quality. The more energy they gather during the whole foraging  
107 phase, the more offspring they have. There is a trade-off between exploration and exploitation: the  
108 longer the learning ('exploration') period, the shorter the foraging ('exploitation') period, but potentially  
109 the higher the efficacy with which the foraging period is used.

110 Offspring inherit their neural network and their learning strategy (the duration of the learning period and  
111 the learning rate) from their parents, subject to rare mutations. Environmental conditions can change  
112 between generations, making learning a potentially adaptive strategy.

113

### 114 **Neural networks**

115 Each individual possesses a neural network that is used to predict the quality of food items on the basis  
116 of environment-specific cues.

117 We consider relatively simple neural networks consisting of 10 neuron-like nodes (Fig 1). In a pilot  
118 study, we also considered more complex networks, but the network considered here performed almost  
119 as well as more complex networks while being faster. Our network receives a cue  $C$  as input and it  
120 produces an output  $Q_p(C)$  that can be interpreted as the predicted quality of a food item emitting that  
121 cue. The networks consist of nodes (the circles in Fig 1) that are organized in a sequence of layers. Each  
122 node is connected to one or several nodes in the subsequent layer (the arrows in Fig 1), and it can  
123 stimulate or inhibit the activities of these nodes.

124  
125

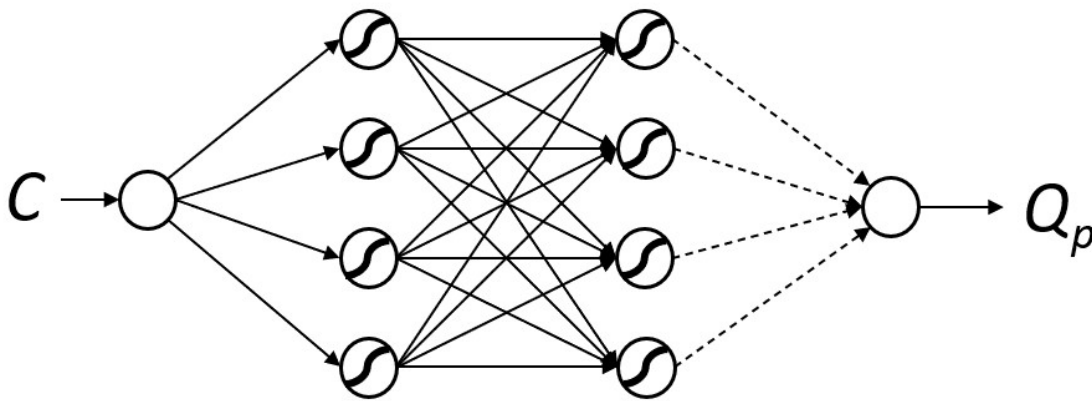

126 **Fig 1. The neural network used in this study.** Our network receives a cue  $C$  as input and it produces  
127 an output  $Q_p$  that is the predicted quality of a food item emitting that cue. In this model we use a network  
128 with one input and one output ( $C$  and  $Q_p$ , respectively) and two hidden layers, each with four nodes.  
129 Arrows indicate the information flow in the network. Solid arrows represent genetically hardwired  
130 connections that do not change during learning. Dashed arrows represent the weights that are genetically  
131 determined but can also change during learning (see text for more details).

132

133 Each connection has a certain strength - weight  $w$ , where a positive value of  $w$  represents stimulation,  
134 while a negative value corresponds to inhibition. The input node receives the cue value  $C$  which is a real  
135 number. This value is processed and determines the node activities at the subsequent level. More  
136 precisely, the activity  $y_i$  of node  $i$  in each layer is given by an expression of the form

137 
$$y_i = A\left(\sum_j w_{ij}x_j + b_i\right). \quad (1)$$

138 Here  $j$  runs over all nodes of the previous layer that are connected to  $i$ ,  $x_j$  is the activity of node  $j$ , and  
139  $w_{ij}$  is the strength of the connection between nodes  $j$  and  $i$ .  $b_i$  is the baseline activation of node  $i$ .  
140 Function  $A$  is a so-called “activation function.” Such functions can be useful, as they allow for more  
141 versatile input-output relationships of neural networks and because they can ensure that the activity  
142 levels  $y_i$  are restricted to a certain range (such as the interval  $[0,1]$ ) [30]. A preliminary test showed that  
143 the results are not strongly affected by the applied activation function. In this paper, we used the  
144 “clamped ReLU” function that is fast and returns 0 if given values lower than 0, and 1 for the values  
145 larger than 1. For values between 0 and 1, it returns these values without transformation. No activation  
146 function was used for the output node.  
147 We assumed that the network architecture does not change throughout the simulation and that all the  
148 network parameters  $w_{ij}$  and  $b_i$  are heritable and transmitted from parents to offspring (subject to  
149 mutation, see below). Therefore, the strength of connections between the nodes and the baseline node  
150 activations can change in the process of evolution. Additionally, some weights can change during the  
151 individual’s lifetime via learning.

152

## 153 **Learning**

154 Four weights of the network connected to the output node (dashed arrows in Fig 1) can be modified via  
155 learning during the individual’s lifetime.

156 Different methods for network learning are used in artificial intelligence applications. Many of them  
157 implement relatively complex algorithms that change all (or most) weights of the network based on  
158 global information (e.g. error backpropagation) and are therefore unrealistic from the biological point  
159 of view. As far as we know, there is no experimental data supporting such learning happening in the  
160 brain. Additionally, at the initial stages of the evolution of learning a simple learning algorithm is more  
161 likely to evolve from scratch.

162 Therefore, we decided to use a simple learning method, inspired by reservoir computing [23,24], that  
163 assumes that learning is more localised in the brain and that it only leads to changes in weights of the  
164 last layer, i.e. weights that directly influence the output of the network. These changes are governed by  
165 the so-called “Delta Rule” that has proven to be effective in reservoir computing and other machine  
166 learning applications [23]. It uses the difference between the current network output (prediction) and the  
167 feedback received from the environment as a teaching signal. Interestingly, local dopamine  
168 concentrations in the brain may signal such prediction error [25,26,31] and prediction-error-based  
169 learning is a well-known phenomenon in animal psychology research [32].  
170 Therefore, the changes in weights of the last layer (connected to the output node; dashed arrows in Fig  
171 1) after one round of learning are given by the ‘Delta Rule’ [30]:

$$172 \quad \Delta w_{ij} = L(Q - Q_p)x_j, \quad (2)$$

173 where  $\Delta w_{ij}$  is the change in the weight connecting node  $j$  in the preceding layer to the output node  $i$ ;  $Q$   
174 is the actual quality of the food item;  $Q_p$  is the quality predicted by the network before the weights are  
175 updated;  $L$  is the learning rate (a heritable parameter), and  $x_j$  is the activation level of node  $j$ .

176 It should be noted that the values of the modified weights are not passed to the offspring, but only the  
177 genes specifying the weights’ values at the beginning of life.

178

## 179 **Environment**

180 Individuals live in an environment that contains food items of different quality. Food items can be  
181 distinguished on the basis of their properties (like colour or smell) that we will call ‘cues’. For simplicity,  
182 we assume that the cues can be arranged on a circle or, equivalently, on the ‘wrapped’ interval  $[-1,1]$ ,  
183 where -1 corresponds to +1. The energetic quality  $Q$  of a food item emitting cue  $C$  is given by a Gaussian  
184 function (see Figure 2):

$$185 \quad Q(C) = \exp\left(-\frac{1}{2} \cdot \left(\frac{C - P}{\sigma}\right)^2\right) \quad (3)$$



186 where  $P$  is the location of the peak of the Gaussian while  $\sigma$  describes the width of the function. In our  
187 simulations, the peak was initially located at zero. As a default, we used  $\sigma = 0.25$ , but other values were  
188 also tested.  
189

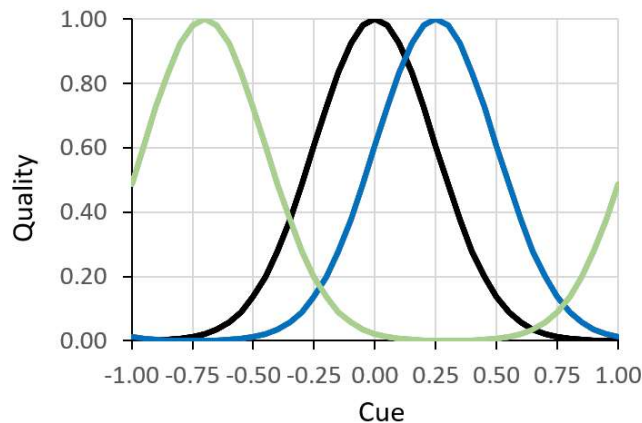

190 **Fig 2. Three Gaussian functions with  $\sigma = 0.25$  illustrating the relationship between food cues and**  
191 **food quality at three different points in time.** The peak of the quality function can shift, indicating a  
192 change in the environment.

193

194 We assume that the environment can change over the generations, in the sense that the quality associated  
195 with specific cues may change. We model this by shifting the whole quality function randomly to the  
196 left or to the right. As mentioned above, we wrapped the quality function in order to assure that the total  
197 amount of resources in every generation is the same (see Fig 2).

198 In order to study the effect of environmental change on the evolution of learning, we considered (a)  
199 different frequencies of environmental change ( $f$ ) – we present results for the values  $f = \{1, 0.1, 0.01\}$ ,  
200 corresponding to a change every 1, 10 and 100 generations, respectively; and (b) different magnitudes  
201 of environmental change ( $m$ ) – how much the peak of the quality distribution shifts (left or right) when  
202 the environment changes. Throughout the simulations we used values  $m = \{0.1, 0.25, 0.4\}$ . Each time  
203 the peak moved, a small error term (with a coefficient of variation of 5%) was added to  $m$  to prevent  
204 that only finitely many peak locations would be experienced in the course of evolution.

205

## 206 **Life history**

207 The lifespan of each individual is divided into a fixed number of discrete timesteps. We focus on a  
208 lifespan of 500 timesteps but later also briefly discuss the effect of shorter lifespan on the outcome of  
209 evolution. The first part of life is spent on learning; the duration of the learning period is either a fixed  
210 parameter or a heritable property. The second part of life is spent on foraging, where previous learning  
211 can potentially improve the ability to choose food items of better quality. At the end of their life,  
212 individuals reproduce and then die.

## 213 **Learning period**

214 In each timestep of the learning period, each individual explores one food item: it gets one randomly  
215 chosen cue, predicts the food quality associated with that cue (using its current neural network), is  
216 informed about the true food quality of the corresponding food item, and updates its network accordingly  
217 (see above). Once the learning period is finished, the network resulting from the succession of learning  
218 steps is used to guide the individual's decisions in the foraging phase. To reduce one source of  
219 randomness from our simulations, all individuals in the population were presented with the same  
220 sequence of random cues during the learning period.

## 221 **Foraging period**

222 In each timestep of the foraging period, each individual is presented with  $n$  food items ( $n$  was set to 5 in  
223 all simulations). Based on the food properties (cues) an individual has to decide which item to consume.  
224 To this end, the individual uses its neural network (that is partly inherited and partly adjusted by  
225 learning) to predict the quality of the food items presented. Subsequently, it consumes the item it  
226 predicted to be the best, gaining energy equal to the food item's true quality. In the next timestep, a new  
227 set of food items is presented, etc. Again, we reduced the randomness by presenting the same sets of  
228 food items to all individuals in the population.

## 229 **Reproduction**

230 Individuals reproduce after the foraging period. The expected reproductive success of an individual is  
231 proportional to the total amount of energy the individual gathered during its entire foraging period. For

232 each of the  $N$  individuals of the offspring generation, a parent is drawn at random (with replacement);  
233 the probability that a given individual is drawn as a parent is proportional to the individual's total energy  
234 gained. The offspring inherits all network parameters, learning rate and the number of learning episodes  
235 from its parent. With per-locus mutation probability  $\mu = 0.01$ , a parental allele is affected by a mutation.  
236 When for a given locus a mutation occurs, a small number  $\epsilon$  is added to the parental value. For weights,  
237 biases and learning rate the mutational step size  $\epsilon$  is drawn from a normal distribution with mean 0 and  
238 standard deviation 0.1. In case of the number of learning episodes (which is a non-negative whole  
239 number), a mutation either leads to the increase or to the decrease by one unit, both with equal  
240 probability. The offspring population replaces the parental population and the new generation starts.

241

## 242 **Simulation setup**

243 In our simulations, we consider a population of  $N = 1000$  haploid individuals and discrete, non-  
244 overlapping generations. Each individual harbours genes that encode the (initial) connection weights  
245 and biases of its neural network (in total 33 values), the learning rate ( $L$  in equation 2) and the number  
246 of learning episodes. Weights and biases can take any real value, the learning rate can be any non-  
247 negative real number and the length of the learning period is an integer in the range  $[0, \text{lifespan}]$ .

248 Each simulation started with a population consisting of individuals with random parameter values. Initial  
249 weights and biases were drawn from a uniform distribution  $U(-1,1)$  and the learning rate from the  
250 uniform distribution  $U(0,1)$ . The number of initial learning episodes was set to a specific value  
251 depending on the type of simulation (see Results).

252 Most simulations were run for 50 thousand generations, but evolutionary equilibrium (judged by the  
253 population average of the amount of gathered energy) was usually reached in a much shorter time.

254

## 255 **Results**

256 We present our results in three sections. In the first section, the duration of the learning period is fixed.  
257 This removes the exploration-exploitation trade-off and allows us to focus on the evolution of the

258 network and the learning mechanism. In the second section, we investigate the joint evolution of the  
259 network and the duration of the learning period in order to study the trade-off between exploration and  
260 exploitation. In the first two sections, we focus on organisms with a lifespan of 500 time units and an  
261 intermediate width of the environmental quality distribution ( $\sigma=0.25$ ). In the last section, we study how  
262 the evolutionary outcome is affected by changes to these parameters.

263

## 264 **Fixed duration of the learning period**

265 As a first step, we fixed the number of learning episodes (LE) to different values. For simplicity, we  
266 present the results for a lifespan of 500, but the same pattern is seen for other lifespans, as long as the  
267 absolute number of learning episodes is the same.

268 One of the most important measures for the performance of a network is its ability to choose a high-  
269 quality food item among the available options. We calculated the relative performance (“performance”  
270 in brief) of a network within a given choice situation by dividing the energy content of the food item  
271 chosen by the energy content of the highest-quality food item on offer. Therefore, performance equals  
272 one if during the foraging period an individual always chooses optimally, and it is smaller than one  
273 otherwise. All other things being equal, a higher performance leads to higher fitness, which in our model  
274 is proportional to the “lifetime energy gain”, that is, to the sum of the energy of all food items collected  
275 throughout the lifetime. When, however, the learning periods differ, a higher performance does not  
276 necessarily result in a higher lifetime energy gain. If the higher performance is associated with a longer  
277 learning period and, hence, a shorter foraging time it may not offset the time “lost”.

278 Fig 3 shows how, for a given duration of the learning period, the performance and the lifetime energy  
279 gain of the evolved learning networks are affected by the frequency and magnitude of environmental  
280 change. As a benchmark, consider first the absence of learning (LE = 0; red dots and lines). For the  
281 environmental quality distribution considered here ( $\sigma=0.25$ ), a randomly choosing individual would  
282 achieve a performance of about 0.41. Even without learning, the networks typically perform better than  
283 this, because they adapt genetically to the pattern of environmental change. Such “adaptive tracking”  
284 [33] can lead to a high network performance if the environmental change is rare and/or if the magnitude

285 of environmental change is small. In the case of  $f=0.01$  (change once every 100 generations) and  $m=0.1$   
286 (small magnitude of change), the non-learning networks achieve practically the same high performance  
287 as the networks that were allowed to learn. In this case, the non-learning networks even have a fitness  
288 advantage (a higher lifetime energy gain), as they do not lose foraging time. On the other hand, if  $f=1$   
289 (change every generation) and  $m=0.4$  (large magnitude of change), the genetic mechanism cannot  
290 adaptively track the environmental changes, and the networks do not perform better than 0.41, the  
291 performance of a random-choice mechanism.

A.

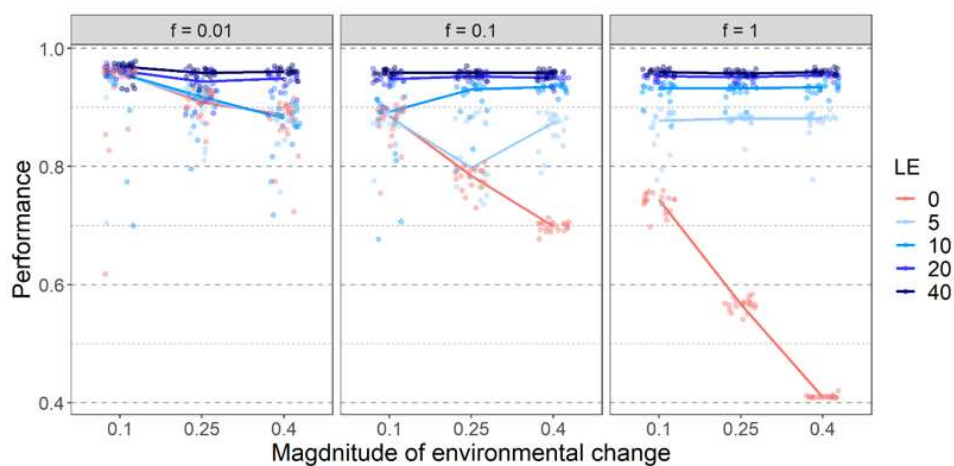

B.

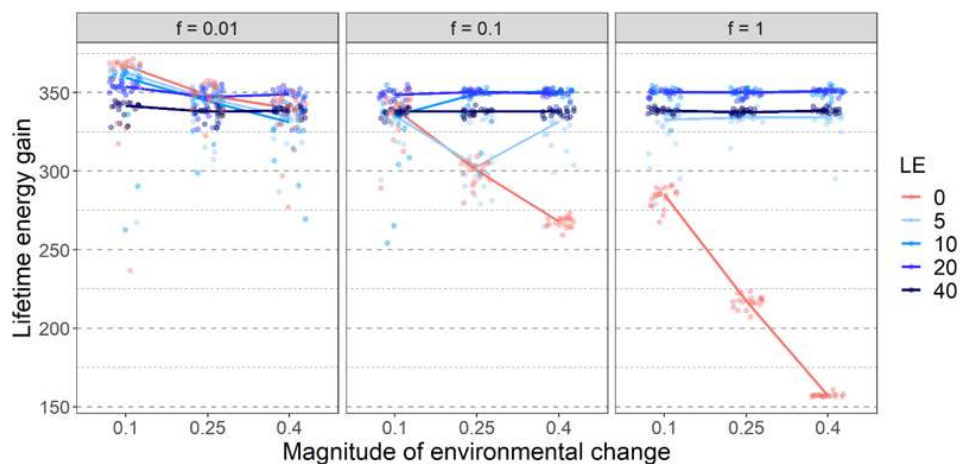

292

293 **Fig 3. Effect of a fixed number of learning episodes (LE) on (A) evolved network performance and**

294 **(B) lifetime energy gain in different environmental regimes. Panels in different columns corresponds**

295 to a different frequency of environmental change  $f$ , ranging from 0.01 (a change once every 100

296 generations) to 1.0 (a change every generation). The  $x$ -axis of each panel represents the magnitude of  
297 environmental change: the distance that the environmental quality peak moves when change occurs. 20  
298 replicate simulations were run for each parameter combination (in all cases, lifespan = 500). Each  
299 replicate is represented by a coloured point, which corresponds to the population mean of this replicate,  
300 averaged over the last 2000 generations. The lines connect the median values of 20 replicates for  
301 different parameter settings. As expected, performance tends to increase with the number of learning  
302 episodes. However, the total amount of resources gained tends to be highest for an intermediate number  
303 of learning episodes, because a longer learning period reduces the time left for foraging.

304

305 As expected, when learning is present, a longer learning period has a positive effect on network  
306 performance (Fig 3A). In general, performance increases with the number of learning episodes, but  
307 levels off from a certain point onward. In other words, the returns from adding more learning episodes  
308 diminish and eventually they become negligible. Therefore, the foraging time lost to longer learning can  
309 to some extent be compensated by improved performance, but there is a limit to that. Accordingly,  
310 fitness (lifetime energy gain) is typically maximized for an intermediate number of learning periods (Fig  
311 3B).

312 Fig 4 shows the temporal dynamics in more detail, for a scenario where the environment changes every  
313 ten generations. Without learning (LE=0), performance drops every time when environmental change  
314 happens and subsequently recovers (due to the genetic evolution of the network) to its former value.  
315 Learning reduces the drop in performance considerably, especially if the learning period is long  
316 (LE=20).

317

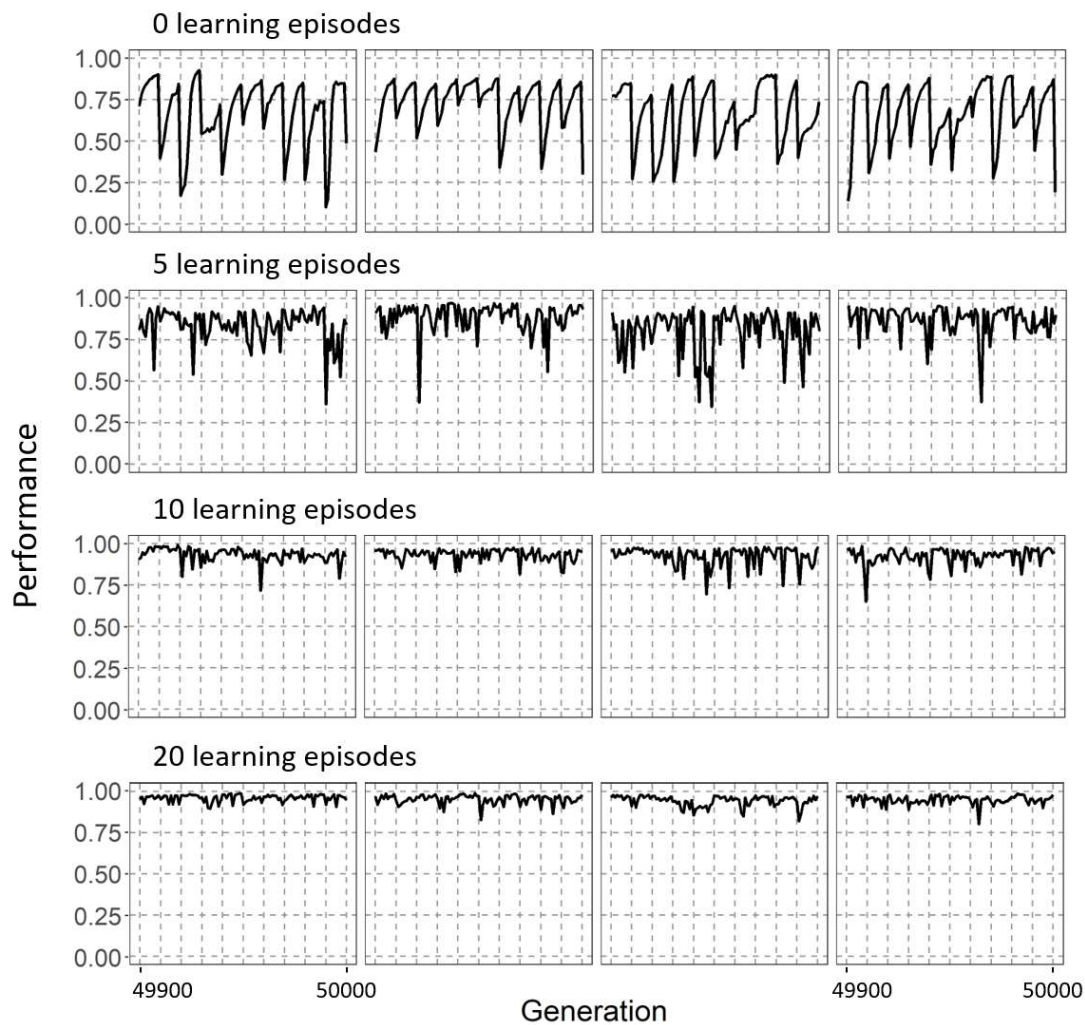

318 **Fig 4. The time course of network performance in a changing environment.** The panels show the  
319 time course of average population performance over the last 100 generations of simulations with an  
320 environmental change rate  $f=0.1$  (change once every 10 generations) and magnitude  $m=0.4$ . For four  
321 values of the number of learning episodes (LE = 0, 5, 10, 20) four randomly chosen replicate simulations  
322 are shown. In the absence of learning (LE = 0), the population performance clearly drops to low levels  
323 every time the environment changes (indicated by vertical dashed lines). With an increasing number of  
324 learning episodes, the drops in performance are smaller, and performance is better throughout the  
325 simulation.  
326  
327 Quite generally, learning strongly improves the match between the real environmental quality and the  
328 one predicted by individuals if the environment changes frequently and/or if the magnitude of change is  
329 large. This is exemplified in Fig 5 which shows prediction profiles for networks evolved for different

330 durations of the learning period. When there is no learning and the environment changed, the prediction  
331 profile does not match the real quality associated with different cues. With learning, the innate quality  
332 prediction can be relatively poor, as it is considerably improved by learning. Even though the predicted  
333 quality after learning does not perfectly match the real environmental quality for all cues, individuals  
334 perform quite well, as they only need to assess the relative quality associated with the five cues available  
335 during one foraging episode and to find the one that is linked with the highest energy level.  
336 Conversely, if environmental change happens less frequently or is smaller in magnitude, even though  
337 individuals spent time learning they are not necessarily efficient at it and a considerable number of  
338 learning episodes is needed to reach an improvement in performance (Fig 3A and Fig A in S1 Appendix).  
339

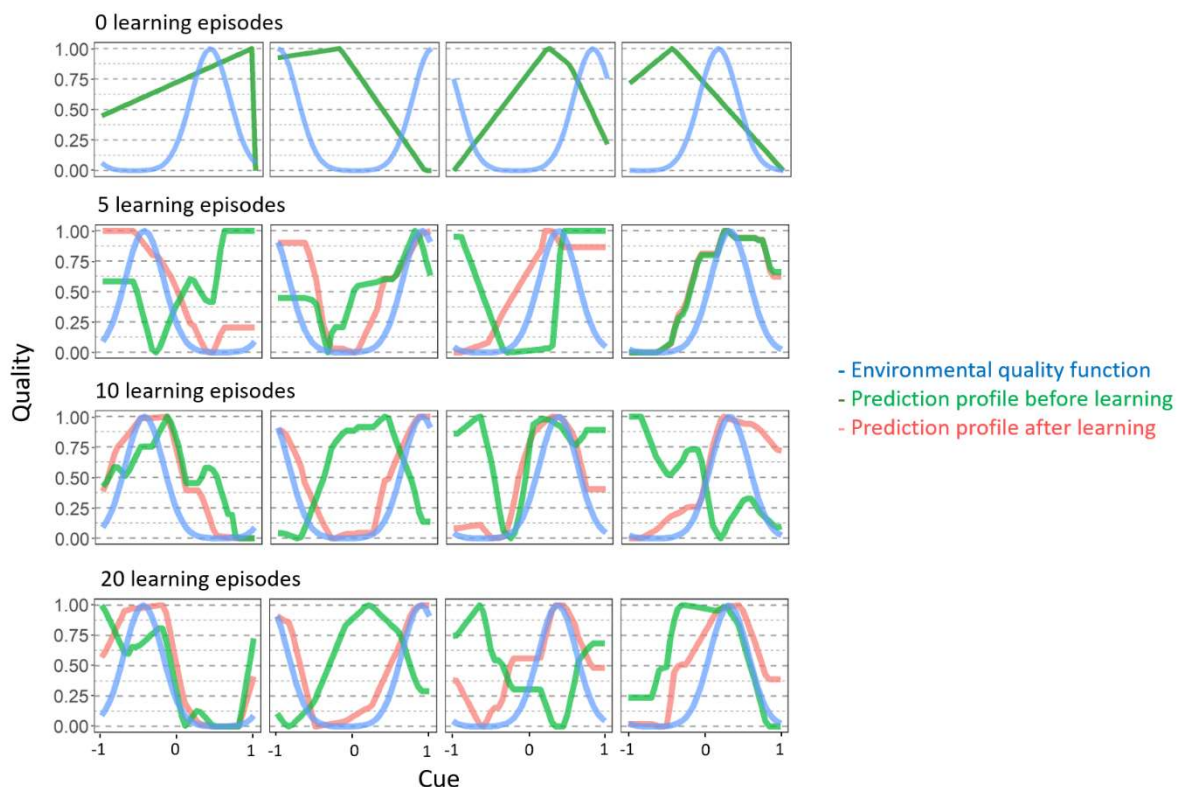

340 **Figure 5. Prediction profiles of networks evolved for different durations of the learning period.**  
341 For each of the 16 populations presented in Fig 4, one network was chosen at random at the end of the  
342 simulation (when the environment had just changed) and was investigated in more detail. The plots show  
343 the environmental quality function (blue), the prediction profile (i.e., the quality predicted for each  
344 possible cue) of the network before learning had started (green) and at the end of the learning period  
345 (red). For longer learning periods, the “learned” prediction profiles (red curve) match the “true”



346 environment quality profile (blue curve) reasonably well, even though the “innate” prediction profile  
347 (green curve) is way off target. Parameter settings as in Fig. 4 ( $f=0.1$ ,  $m=0.4$ ).

348

349 Examples of the evolved neural networks and the effect of learning on the weights can be seen in Fig 6.

350 In different replicates, different networks evolved, but within a replicate variability between individuals

351 was low.

352

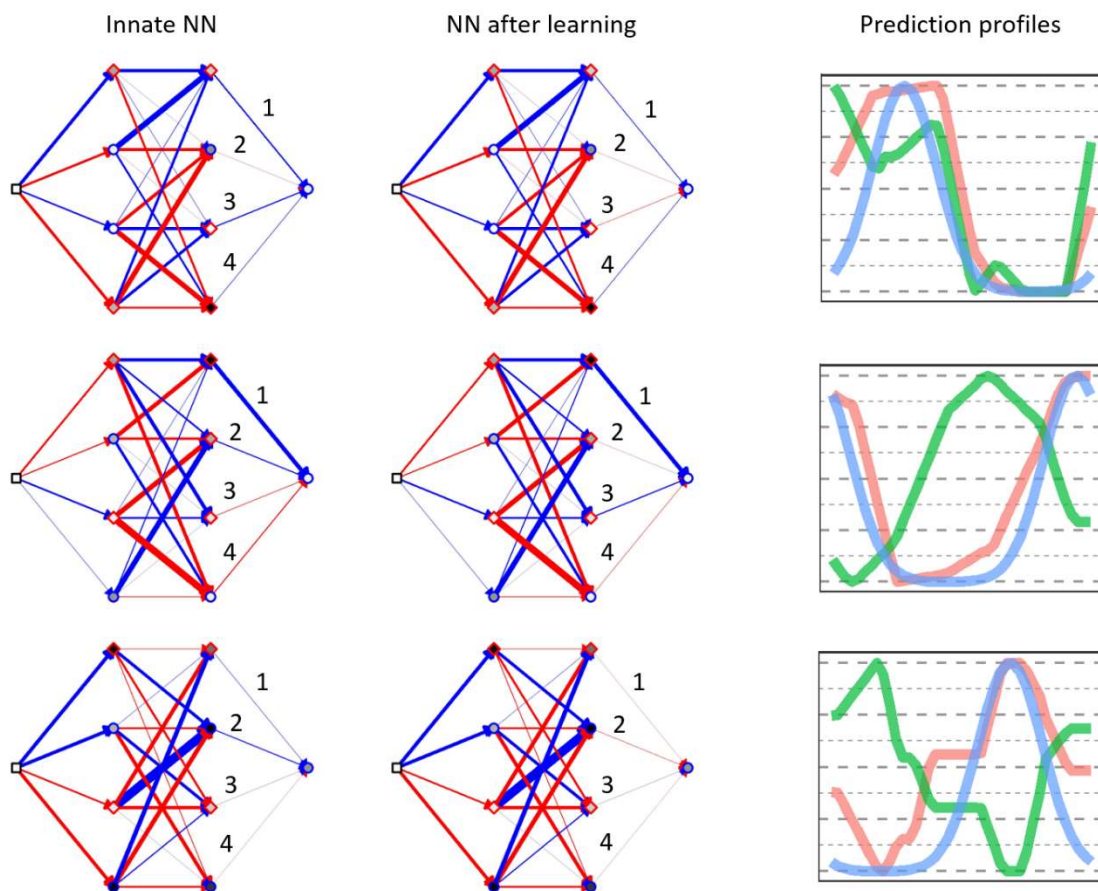

353 **Fig 6. Examples of evolved neural networks and their prediction profiles before and after learning.**

354 Networks from three different replicates from simulations with  $LE = 20$  are shown (three of the four

355 individuals shown in Fig 5). Blue arrows correspond to excitatory connections (positive weights) and

356 red to inhibitory connections (negative weights) The thickness of the lines is proportional to the strength

357 of the connection. The baseline activation of each node is represented by circles with a blue edge for

358 positive values and by diamonds with a red edge for negative values. The absolute strength of the

359 baseline activation is given by the inner shading of the symbol, the darker the colour the larger the value.

360 During learning only the four numbered weights can change. For example, for the network in the centre,  
361 two weights changed the strength and the type of connection (from excitatory to inhibitory - weight 2;  
362 and the other way round – weight 3) and weight 4 weakened in strength. Such relatively small changes  
363 to the network lead to a drastic change in the prediction profile (right column, plotting convention as in  
364 Fig 5). Note that the four “learning weights” of the networks tend to have smaller absolute weight values  
365 (thinner lines) than other weights. This was a common pattern for networks that evolved efficient  
366 learning (Fig C in S1 Appendix).

367  
368 We also looked at the evolved learning rate. In environmental settings in which learning increases  
369 performance (i.e., when environmental change is frequent and/or of large magnitude), the learning rate  
370 tends to slightly decrease with the increasing learning period (Fig B in S1 Appendix). In other words,  
371 when the learning period is brief, learning tends to take place in larger strides, while it tends to take  
372 place in smaller steps when there is much time for learning.

373

## 374 **Evolution of the duration of the learning period**

375 From now on, we assume that the duration of the learning period coevolves with the learning rate and  
376 the properties of the network. Accordingly, the evolutionary outcome reflects the exploration-  
377 exploitation trade-off: the system should evolve to a state in which the time spent learning (and lost for  
378 foraging) is compensated by the better choices made during foraging. There is, however, a start-up  
379 problem. When a simulation starts with a random network, the learning period may evolve toward zero  
380 (as learning does not provide any benefit at the early stage of network evolution). Once the learning  
381 period is around zero, and the selection for learning is weak, the evolution of the optimal number of  
382 learning episodes is hampered. To overcome this problem, we started each simulation with a fixed  
383 number of learning episodes ( $LE = 20$ ) and let the network and the learning rate evolve for 10K  
384 generations. After this initial period, the number of learning episodes became subject to mutations and  
385 could therefore start to evolve as well for further 50K generations.

386 Fig 7 shows that learning persists in the population under a broad range of environmental conditions,  
387 leading to greatly increased performance and fitness (compared to a population with no learning; Fig  
388 7A). This shows again that the time spent learning can be compensated by the better choices made in  
389 the foraging phase. In other words, the benefits of learning often outweigh the costs in terms of a  
390 shortened foraging time.

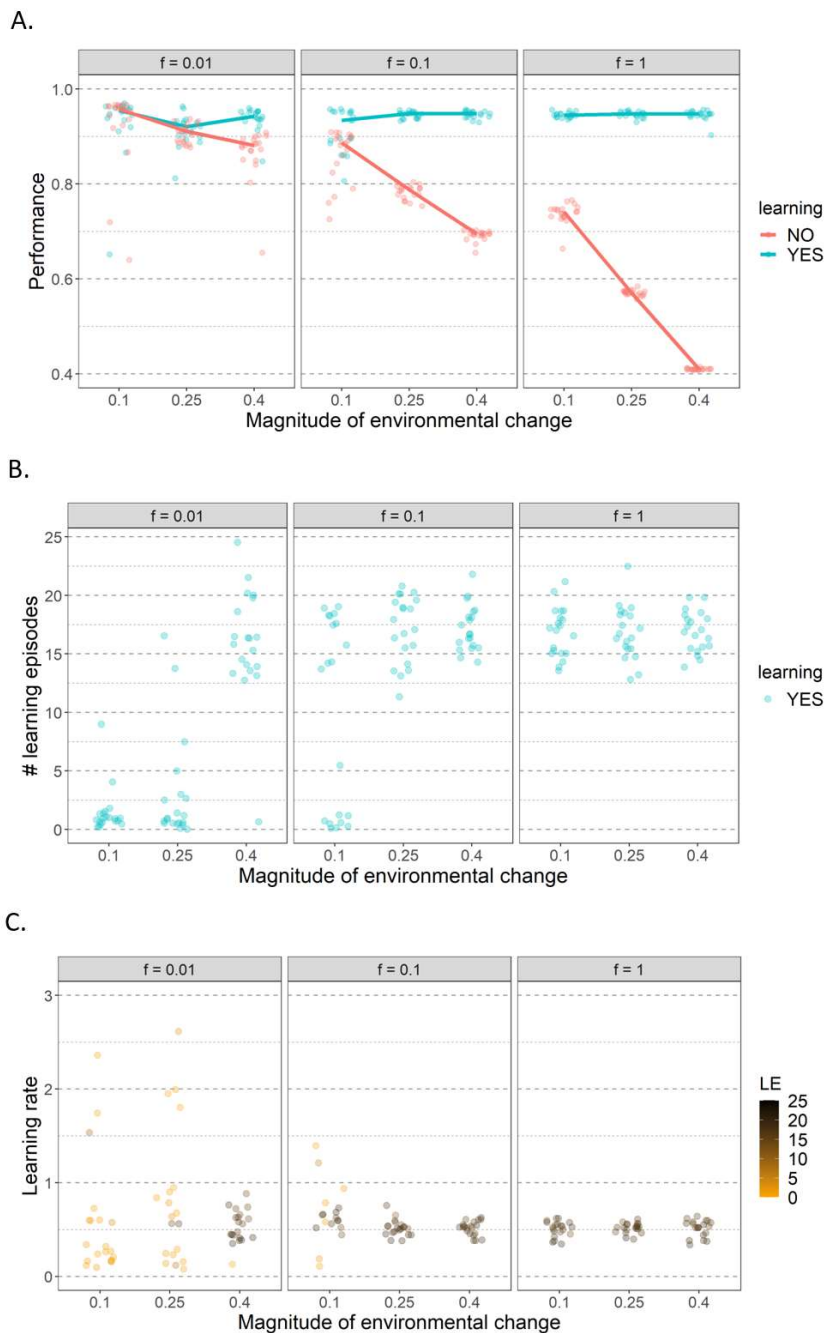

391 **Fig 7. The joint evolution of (A) network performance, (B) duration of the learning period, and**  
392 **(C) learning rate for various environmental scenarios. Parameter settings and graphical conventions**

393 are as in Fig. 3. In (A), the performance of the evolved networks in the simulations in which learning  
394 was allowed to evolve is shown in turquoise. For comparison, the simulations in Fig. 3A where learning  
395 was not allowed to evolve ( $LE=0$ ) are also shown (in red). (B) shows the evolved number of learning  
396 episodes. Notice that LE often evolves toward zero (i.e., learning disappears in the course of evolution)  
397 when the magnitude of change is small and environmental change is infrequent. (C) shows the evolved  
398 learning rates – different colours indicate the association between the evolved learning rate and the  
399 evolved duration of the learning period in the replicate simulations. Notice that the evolved learning rate  
400 is close to 0.5 in all simulations where learning evolved ( $LE > 10$ ). When learning disappeared in the  
401 course of evolution ( $LE < 5$ ), the learning rate is no longer under strong selection and can take on many  
402 different values (three data points with  $LE < 5$  are not visible, as the learning rate exceeds 3).

403

404 Whether learning evolves can be to a large extent predicted from the results of the previous section. Fig  
405 3 shows what number of learning episodes (among the ones tested) lead to the highest gain in resources,  
406 and, hence fitness. For example, when the environment changes every generation the simulations with  
407 learning episodes of 10 and 20 obtained the highest energy. When we let the number of learning episodes  
408 evolve it reaches a median value of around 17 (Fig 7B). On the other hand, when a small change of 0.1  
409 happens every 100 generations, then the highest energy gain was obtained in simulations with no  
410 learning. In line with this, the number of learning episodes converges to zero, corresponding to the loss  
411 of learning from the population.

412 Smaller and less frequent environmental changes reduce the likelihood that learning is maintained.  
413 Interestingly, when learning evolves, the number of learning episodes, network performance, and  
414 network fitness are practically independent of the magnitude or frequency of environmental change (Fig  
415 7). This seems to be due to the fact that when effective learning evolves, the networks do not track  
416 environmental change genetically but fully rely on learning. In other words, the “innate prediction  
417 profile” is relatively stable over time, while the “learned prediction profile” is adjusted to the current  
418 environmental quality function (see Fig D in S1 Appendix).

419 In addition to the duration of the learning period (the number of learning episodes), the learning rate is  
420 also an important aspect of the learning strategy. This parameter is also practically independent of the  
421 environmental conditions in the replicates in which the efficient learning evolved (Fig 7C).

422 Fig 8 illustrates that the relationship between the number of learning episodes and performance is not  
423 straightforward. First of all, in some environmental conditions, the outcome of evolution differs  
424 considerably across replicates. If that is the case, networks that do not learn have worse performance  
425 (their ability to choose the best environment is lower) than networks that learn (Fig 8). This is often  
426 linked with lower fitness, i.e., more time spent foraging does not compensate for lower performance.  
427 However, similarly to what we observed in the previous section, when learning evolves, a longer  
428 learning period does not always lead to better performance. In some environmental regimes, a wide  
429 range of learning episodes leads to practically the same performance (Fig 8). We hypothesize that the  
430 variability between replicates might be partly explained by the properties of the coevolved networks.  
431 Each replicate evolves a unique network that likely affects the effectiveness of learning. Loss of learning  
432 in some replicates even if retention of learning could potentially lead to higher fitness could be linked  
433 to the learning ability of a specific network. However, due to the complexity of the system, we were not  
434 able to prove this hypothesis. It is also worth noting that in environmental regimes that lead to either  
435 loss or maintenance of learning, in some replicates in which learning was lost at some point, it revolved  
436 again.

437 Within each environmental regime, a range of learning episodes evolve. One might expect that in  
438 replicates in which the learning period is shorter, the learning rate is higher to allow for faster adjustment  
439 of weights and *vice versa* (similarly to the situation with fixed LE). When efficient learning evolves, in  
440 some environmental regimes there is indeed a negative relation between the learning rates and the  
441 number of learning episodes, but this is not a general trend (Fig 9). For example, for a small (0.1)  
442 environmental change every 10 generations, in replicates in which learning evolved the learning rate  
443 value seems to be even slightly positively correlated with the number of learning episodes (Fig 9). If the  
444 number of learning episodes is very small (below 5), learning is not effective (Fig 8) and the learning  
445 rate is very variable between replicates, consistent with random drift (Fig 9).

446

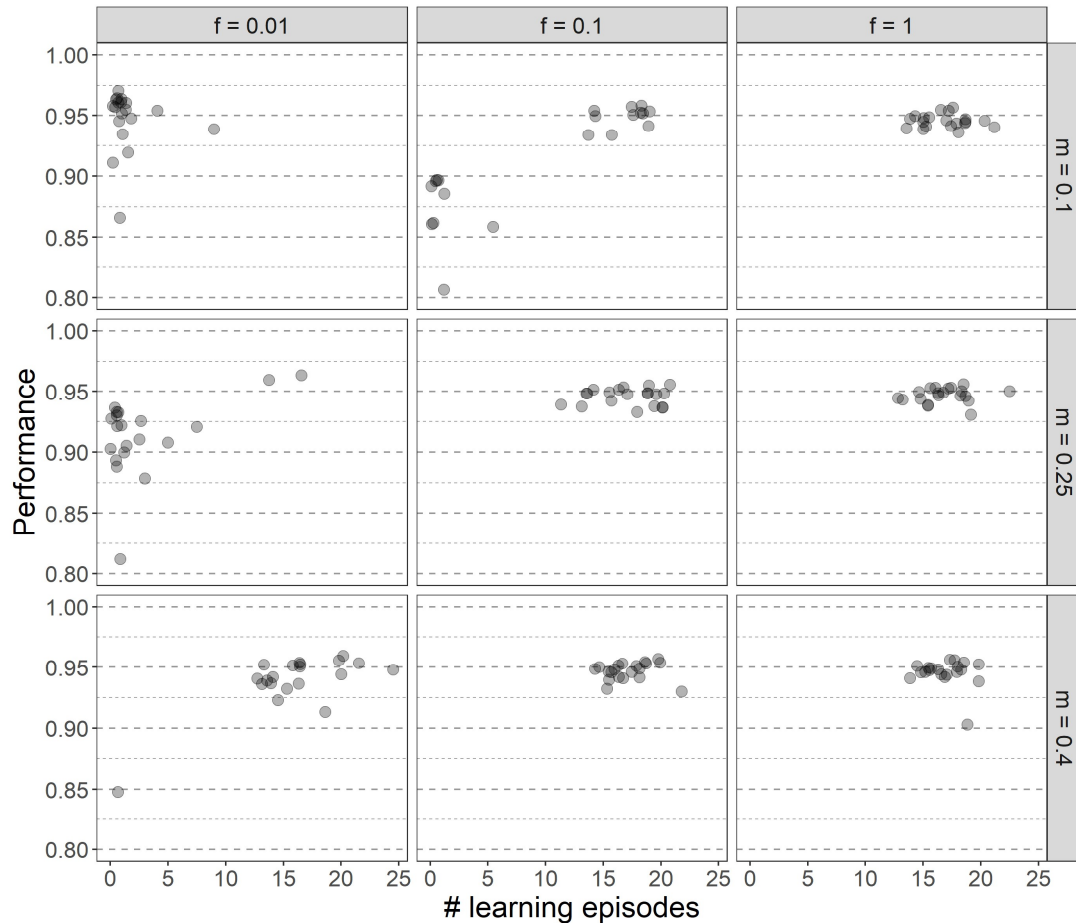

447 **Fig 8. The relationship between performance and the number of learning episodes in different**  
448 **environmental regimes.** Different columns correspond to different frequencies of environmental  
449 change ( $f$ ) and different rows to different magnitudes of environmental change ( $m$ ). Each point  
450 represents the average of the population mean over the last 2000 generations of a single replicate. One  
451 simulation ( $f=0.1, m=0.1$ ) with low average LE (=0.93) is not visible, as the average performance (=0.65)  
452 was too low.

453

454 The last, but crucial part of the evolved learning mechanism is the neural network itself, and specifically  
455 the value of its weights. Neural networks are notoriously difficult to analyse but we decided to look at  
456 some of the properties of evolved neural networks. The only pattern we could see is that the average  
457 strength of connections that can be adjusted through learning was clearly lower for networks that  
458 evolved learning compared to networks that did not evolve learning (Fig C in S1 Appendix). This  
459 suggests that efficient learning cannot be achieved when weights are too high.

## 460 Effect of lifespan and environment on the evolution of learning

461 Until now, we considered an organism with a lifetime of 500 timesteps where the exploration-  
462 exploitation trade-off is relatively weak because efficient learning can be accomplished within a period  
463 of 20 timesteps. In this section, we consider an organism with a lifespan of only 50 timesteps, where the  
464 cost of learning is much larger, as each timestep spent learning corresponds to 2% of the organism's  
465 lifetime and hence reduces the foraging time considerably.

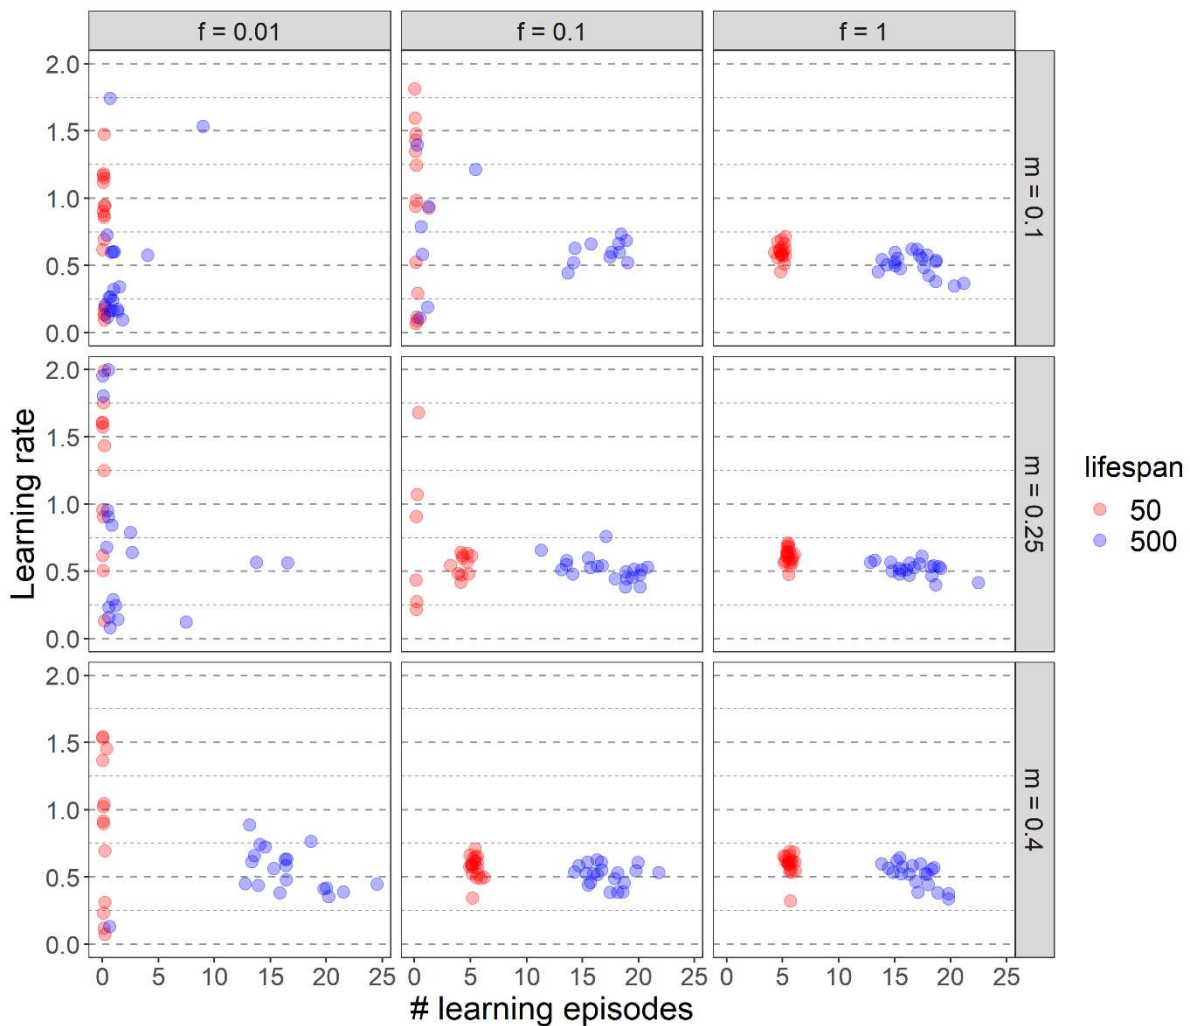

466 **Figure 9. Effect of lifespan on the evolution of learning.** For two lifespans (50 timesteps: red; 500  
467 timesteps: blue) each panel shows the evolved relationship between the learning rate and the number of  
468 learning episodes in 20 replicate simulations. The panels correspond to different environmental regimes:  
469 the columns show three frequencies of environmental change ( $f$ ) and the rows three magnitudes of  
470 change ( $m$ ). Each point represents the average of the population mean over the last 2000 generations of

471 a single replicate. For clarity, only learning rates up to 2.0 are shown; 34 data points with a learning rate  
472 above 2.0, all with a very low number of learning episodes (= no learning), are not visible.

473

474 For various environmental regimes, Fig 9 compares the evolutionary outcome for the two lifespans  
475 considered. Not surprisingly, learning is less likely to evolve in the case of a shorter lifespan, especially  
476 in those environmental regimes where adaptive tracking is, at least to a certain extent, efficient (a low  
477 rate of change and/or a small magnitude of change). When learning evolves despite the short lifespan,  
478 the evolved learning period is shorter in absolute terms (smaller number of learning episodes) but longer  
479 in relative terms (a larger percentage of the lifespan is spent on learning). As in the case of a long lifespan  
480 (Fig 7BC), both the number of learning episodes and the learning rate is practically independent of the  
481 magnitude and rate of environmental change. However, the number of learning episodes is less variable,  
482 reflecting a stronger selection on the efficient use of every single timestep.

483 Fig 10 shows that, whenever learning evolves at all, the resulting performance is smaller in case of a  
484 short lifespan. In view of the fact that short-lived organisms spend less time learning, this is not too  
485 surprising. Interestingly, when learning evolves in both lifespan conditions, even though the number of  
486 learning episodes is clearly different, the evolved learning rate is only slightly higher for lower lifespan  
487 for some environmental conditions (e.g. for the very frequent environmental change) but is independent  
488 of the lifespan for other conditions (see Fig 9 and Fig E in S1 Appendix).

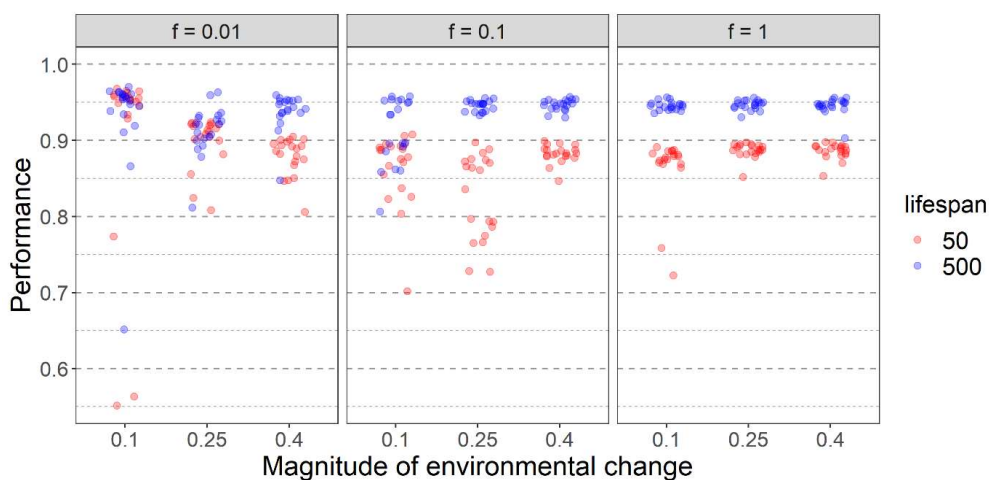

489 **Fig 10. Effect of lifespan on performance.** Results for two lifespans (50 timesteps: red; 500 timesteps:  
490 blue) and nine environmental regimes (defined by the rate  $f$  and the magnitude  $m$  of change) are shown.



491 The average population performance in the last 2000 generations of 20 replicate simulations for each  
492 parameter set is indicated by coloured dots.

493

494 All results presented thus far were based on an environmental quality function with  $\sigma = 0.25$  (Fig 2).  
495 Here, we consider the implications of a narrower ( $\sigma = 0.1$ ) or a wider ( $\sigma = 0.4$ ) Gaussian function. If the  
496 function is narrow, only a small fraction of the available food is of high quality. Therefore, mistakes in  
497 choosing among food items potentially lead to a severe loss of fitness. On top of this, environmental  
498 change has a more drastic effect. If, for example, the magnitude of environmental change is large (e.g.,  
499  $m = 0.4$ ), all high-quality food items in the previous generation become low-quality, while a small range  
500 of the previously low-quality items become high-quality after the shift. One would therefore expect a  
501 much stronger selection for learning in case of  $\sigma = 0.1$ . Conversely, selection for learning is expected to  
502 be weaker in case of  $\sigma = 0.4$ .

503 Fig 11 shows how the evolution of learning (= the evolved duration of the learning period) depends on  
504 lifespan and the width of the environmental quality function. Figs E and F in S1 Appendix show the  
505 corresponding learning rates and performance levels, respectively. Consider first the case of a narrow  
506 quality function ( $\sigma = 0.1$ ). As argued above, one would expect that learning is more important in this  
507 case. It is therefore somewhat surprising that learning less easily off the ground than in our standard  
508 scenario ( $\sigma = 0.25$ ). This may be explained by the fact that efficient learning is difficult to achieve in the  
509 case of a narrow quality function. The reason can be that most of the cues sampled during the learning  
510 period are of very low (practically zero) quality (cues are sampled randomly); accordingly, these cues  
511 provide little information on where the peak of the function is located.

512 When the quality function is broad ( $\sigma = 0.4$ ) the environmental conditions (frequency and magnitude of  
513 change) in which learning evolves are very similar to the ones with  $\sigma = 0.25$  (Fig 11). One clear  
514 exception is an environmental change of  $m=0.25$  every 10 generations ( $f=0.1$ ) for the lifespan of 50. In  
515 this case for  $\sigma = 0.4$  learning never evolves, while it does for roughly half of the replicates for  $\sigma = 0.25$ .  
516 It seems that for a relatively small and rare change spending time learning doesn't compensate enough  
517 for lost foraging opportunities if food quality changes only slightly around the peak and choosing less  
518 optimally does not reduce fitness considerably (for  $\sigma = 0.4$ ).

519

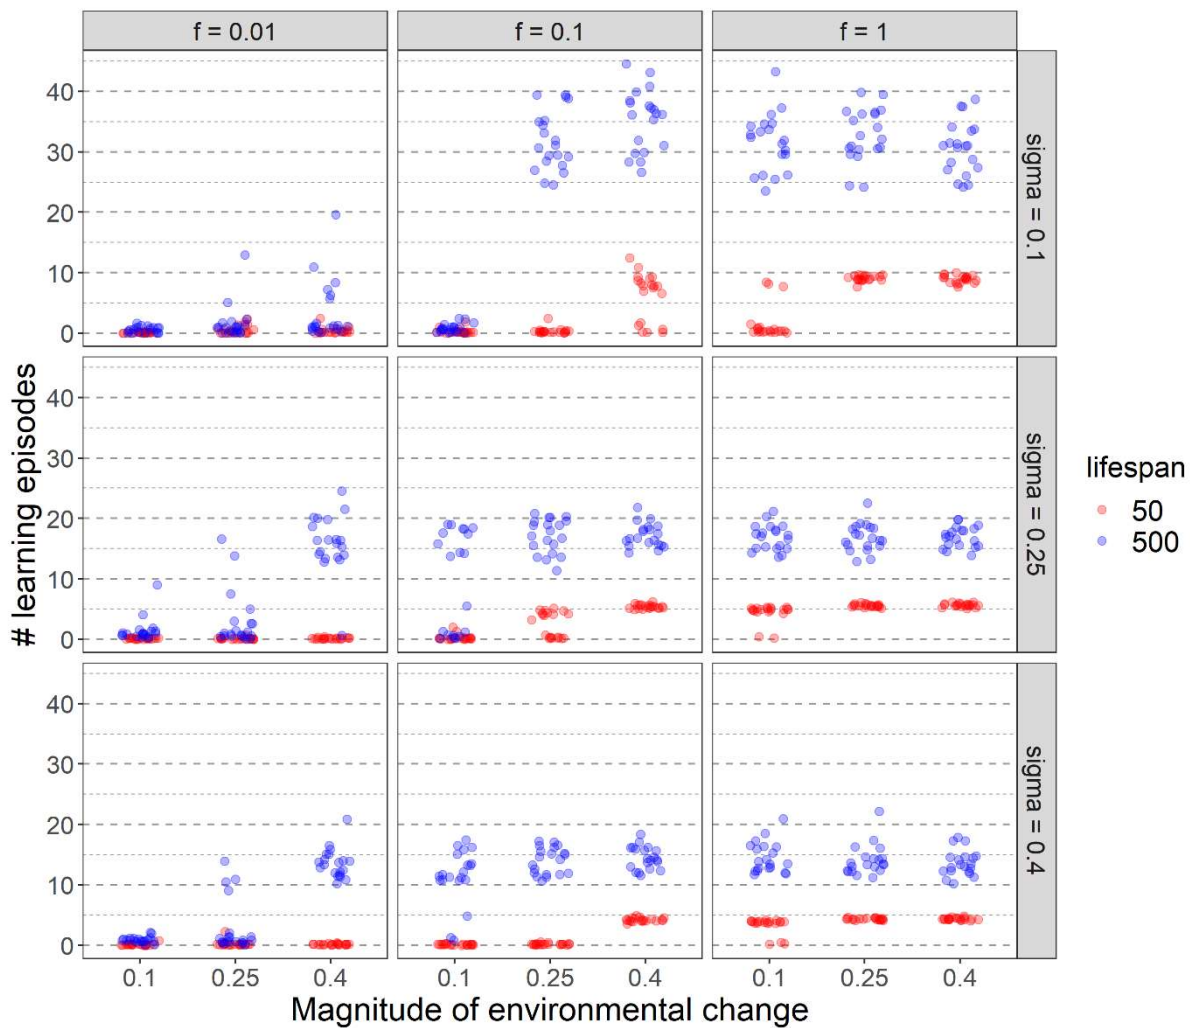

520 **Fig 11. Effect of lifespan and the width of the quality distribution on the evolution of learning.**

521 Rows correspond to different values of  $\sigma$  (sigma), that is, to different widths of the quality function.

522 Graphical conventions as in the previous figures.

523

524 When learning is maintained, the number of learning episodes increases with decreasing  $\sigma$ , while at the

525 same time, performance decreases (Fig F in S1 Appendix) as every mistake is more costly. Similarly,

526 the learning rate decreases with decreasing  $\sigma$ , supporting the general expectation that with a lower

527 number of learning episodes, the learning rate should be larger to allow for faster learning in a shorter

528 time (Fig E in S1 Appendix). However, as noted earlier, within one environmental regime learning rate

529 might not correlate with the number of learning episodes.

530 As observed earlier, for a given width of quality distribution, if learning evolves the number of learning  
531 episodes and learning rate do not depend on the magnitude and frequency of environmental change (Fig  
532 11 and Fig E in S1 Appendix).

533

## 534 Discussion

535 We presented a novel way of modelling the evolution of learning, using small neural networks and a  
536 simple, biology-inspired learning algorithm. We used this model as a tool to answer evolutionary  
537 questions that are usually tackled by simple analytical models. Contrary to analytical methods, even a  
538 relatively simple network, as studied here, allows for more complex phenotypes and learning strategies  
539 and at the same time can lead to efficient adaptation and novel insights into the evolution of learning.

540 In line with the literature (e.g [6,10,27,34]), the frequency of environmental change had a large effect  
541 on the probability that learning will be maintained in the population. The same holds for the magnitude  
542 of environmental change, although this aspect of environmental variation has rarely been studied.  
543 Usually, environmental change is assumed to be random and there is no correlation between subsequent  
544 environmental states (e.g., [10,35] and references therein), even though it is likely not the case in the  
545 real world [36]. In our model, when environmental change is infrequent and/or small, genetic tracking  
546 evolved. In less stable environments, learning (a “plastic” response) was selected for, but if the change  
547 was very frequent and large, individuals made random choices – a strategy resembling bet-hedging.  
548 Similar results for the evolution of adaptive tracking, plastic responses, and bet-hedging were observed  
549 by Botero *et al.* [33], although they modelled the predictability of the future environment based on the  
550 current cues, while in our model different magnitudes and frequencies of environmental change can say  
551 something about how much the current environment predicts a future state.

552 Whenever learning evolves one might expect that the learning strategy (the length of the learning period  
553 and the learning rate) is fine-tuned to the environmental change regime. However, surprisingly, we  
554 found that the learning strategy was independent of the environmental change regime. To the best of our  
555 knowledge, our study is the first to report such a finding. The few studies that investigated such effects  
556 reported a relationship between the frequency of environmental change and the evolved or optimal

557 learning parameters [28,29,34,37,38]. We are not aware of any neural network models studying the  
558 effect of environmental change regimes on the learning strategy.

559 The discrepancy between our results and those of previous studies may reflect the higher number of  
560 degrees of freedom in our model or the peculiarities of the task itself. In earlier models, learning  
561 (governed by a single parameter) affects only one variable., which is sometimes identical to the  
562 “phenotype”. Under this restriction, different learning parameter values seem necessary to deal with  
563 different frequencies of environmental change. In our model, the “phenotype” is more complex (the  
564 function ascribing a predicted quality to a range of cues) and learning affects more than one parameter  
565 (four network weights). When the environment changes, the relationship between cues and their quality  
566 changes. In this case, when efficient learning evolves it lets organisms predict the current location of the  
567 environmental peak, independent of when and how much it changed in the past. In the future, it would  
568 be interesting to study the evolved learning strategy of networks challenged by a different task, e.g.  
569 having to know the quality of all environmental cues, rather than just identifying the ones that are the  
570 best in a set of options.

571 For learning to be efficient, not only a learning strategy must be fine-tuned, but also the underlying  
572 neural network. While many networks can perform the task, not all are suitable to learn. For example,  
573 our initial networks with random weights did not support efficient learning and the performance of our  
574 simulated organisms was initially poor. Randomly initialised neural networks can show a good  
575 performance if the learning algorithm is very efficient (e.g. backpropagation) and if the learning consists  
576 of many learning steps [39]. However, different studies consistently indicate that networks that evolved  
577 initial weights can be trained significantly faster and better than networks with random initial weights  
578 [20,40] (but see the discussion on reservoir computing below). This seems to apply also to our less  
579 sophisticated learning mechanism and supports the view that learning and evolution together are more  
580 successful than either alone [40,41]. As noted by Mery and Burn “evolution of a combination of learning  
581 and innate behavioural responses is probably a common process” [42] but it has very rarely been  
582 included in models of the evolution of learning. Neural networks provide an intuitive way of studying  
583 the intertwined evolution of innate and learned responses to the environment.

584 Another interesting finding of our study is that the distribution of resources in the environment strongly  
585 affects the probability of learning evolving and the evolved learning strategy. To our knowledge, this  
586 has never been observed (or even investigated) before. When only a small fraction of available resources  
587 provides nutrients (small  $\sigma$  in our model) then one could expect that learning would be more likely to  
588 evolve to allow individuals to find the cues that are linked with profitable food. However, this is not the  
589 case and learning is actually less likely to evolve then. It seems that learning is less likely to evolve  
590 whenever sampling the environment can lead to frequent encounters with items that do not provide  
591 resources and therefore information – “clueless environments” [43]. In this case, spending time learning  
592 is relatively more costly, which seems to shift the cost-benefits balance against learning. More studies  
593 looking at this aspect of the environment would be welcome.

594 Not only environmental but also organismal properties can affect the evolution of learning. One obvious  
595 one is an organism’s lifespan. While it is generally assumed that shorter-lived organisms should invest  
596 less in cognitive functions, as the cost of learning is relatively larger while the time to profit from  
597 learning is shorter (see the discussion on this topic in [29,44]), there are, to the best of our knowledge,  
598 only two modelling studies that investigated the effect of lifespan on learning. Eliassen *et al.* [28] studied  
599 learning in the context of the exploration-exploitation trade-off and showed that learners should invest  
600 less in learning for shorter expected lifespans (higher external mortality). But the optimal speed of  
601 learning depended not only on the expected lifespan but also on the temporal change in the environment.  
602 Liedtke & Fromhage [29] built a vastly different and simpler model in which learning reduced the  
603 handling time of food items. They showed that the learning speed and the investment in learning (in  
604 their model the higher the learning speed the higher costs paid) should be highest for short and  
605 intermediate lifespans. Our results are to some extent in line with those of Eliassen *et al.* and the common  
606 wisdom that short-lived organisms should invest less in learning. However, in our model, lifespan and  
607 the pattern of environmental change have a surprisingly small (or even negligible) effect on the learning  
608 speed when learning evolves. Clearly, details of the model assumptions can have a profound effect on  
609 the model outcomes. Therefore, additional studies, both theoretical and empirical, on the effect of  
610 lifespan on learning are needed.

611 It is generally accepted that learning is costly. The costs can be manifold, for example, energetic costs  
612 of growth and maintenance of the brain tissue, resource allocation trade-offs, or increased mortality due  
613 to suboptimal behaviour during the learning phase (see e.g. [6,45–47]). In many studies, the cost of  
614 learning is just one of the parameters included *a priori* in the model (see e.g. [10] and references therein).  
615 To avoid extra assumptions, the only cost of learning in our model stems from the limited lifespan and  
616 the trade-off between exploration (learning) and exploitation (foraging). To this end, our model assumes  
617 that an individual's life is divided into two separate stages: learning and foraging. This is clearly a  
618 simplification, as animals can learn during their whole life. However, this simplification was used in  
619 models before (e.g. [48]) and it is to some extent justified by the observation that in many animals  
620 (including humans), early life (childhood) is characterised by much more intense learning than later life  
621 [49]. Separation of the learning and foraging phases allows for a better understanding of the evolved  
622 strategies under a time constraint. However, since learning also incurs other costs (see above) our model  
623 is a starting point for studying the minimal requirements for learning to evolve [50]. It would also be  
624 interesting to consider scenarios where the environment changes during an individual's lifetime. In that  
625 case, it is not the best strategy to learn only at the beginning of life. Future models could implement life-  
626 long learning and allow for learning while foraging.

627 In our model, learning induces a change in the nervous system that usually leads to an improvement in  
628 performance. But this is not always the case, e.g. if the learning period is very short. This finding  
629 undermines the common assumption that, as long as the learning cues are reliable, learning will always  
630 improve performance or even lead to perfect behaviour (e.g. [10,35,51]). Mechanistic approaches like  
631 ours are required to elucidate whether and when such an assumption is justified.

632 Neural network models are especially suited to answer evolutionary questions concerning behaviour as  
633 they explicitly incorporate the proximate stimulus-response aspect of behaviour. Optimisation  
634 approaches (tend to) neglect the proximate underpinning of adaptations. Neural networks are also suited  
635 for more complex problems than the ones that can be tackled with analytical methods [52]. Also, as  
636 mentioned earlier, they provide a great opportunity to study the coevolution of innate behaviours  
637 together with the evolution of learning mechanisms. In our model, learning affected only part of the  
638 network – this approach was inspired by reservoir computing in which also only the weights linked to

639 the output node change, yet the network can still learn complex tasks [23,24,53]. Such a learning  
640 mechanism seems very suitable for evolutionary studies as it is unlikely that in early animals a single  
641 learning event could affect all connections in the network as is usually assumed in AI applications.  
642 We draw inspiration from reservoir computing in the sense that learning affects only a small subset of  
643 network weights. However, our network and the task it needs to perform is much simpler than what is  
644 potentially possible with a reservoir computing approach and what biological brains can do [23,24,53].  
645 Promising future projects could incorporate larger networks that not only pass information in one  
646 direction (feed-forward) but also include backward connections and feedback loops (allowing for  
647 longer-term memory). Such “reservoir” networks could dynamically store various types of inputs,  
648 making them available for a diversity of decision-making processes, such as making decisions in the  
649 context of foraging, predator avoidance, mating, and social behaviour. Each type of decision (which we  
650 henceforth will call a “domain”) would be governed by domain-specific output nodes, which are  
651 connected to the reservoir. Domain-specific learning could happen as in our model: based on simple  
652 mechanisms only affecting the connections to the domain-specific output nodes. Each output node may  
653 have its own domain-specific connections with the reservoir, allowing output nodes governing foraging  
654 behaviour to tap into different parts of the reservoir than output nodes linked with predator avoidance.  
655 By considering mutations that break or create connections from the output nodes to reservoir nodes, this  
656 part of the network architecture could evolve by domain-specific selection. Such partial restructuring of  
657 the network would likely make behaviour and learning more efficient [24,54], even though learning  
658 would affect only a small fraction of the connections. The domain-general reservoir could also be shaped  
659 by natural selection. Interestingly, the demands on the reservoir may not be stringent, provided that it is  
660 sufficiently complex: as shown in the literature on reservoir computing [23,24,53]. Reservoir-based  
661 learning can be very efficient even if the connections between the nodes of the reservoir are quite  
662 arbitrary (i.e., if the connection strengths are drawn at random). A network model as sketched above  
663 would allow using the same environmental information and network structure to perform different tasks,  
664 as is also seen in the animal brains [24] without making a priori assumptions on what environmental  
665 cues are important in different contexts.

666 In conclusion, we showed that a biologically inspired, yet relatively simple, learning mechanism can  
667 evolve to lead to an efficient adaptation in a changing environment. We hope that our model will serve  
668 as an inspiration for future work on more challenging research projects and ultimately to a better  
669 understanding of the evolution of learning.

670

## 671 **Acknowledgements**

672 We thank the MARM and MINDS groups at the University of Groningen for valuable discussions. This  
673 work was supported by the European Research Council (ERC Advanced Grant No. 789240 awarded to  
674 F.J.W.).

675

## 676 **Supporting information**

677 S1 Appendix. **Supplementary figures A-F.**

678 The source code (in C++) for the simulation program is available at  
679 [https://github.com/marmgroup/evolution\\_of\\_learning](https://github.com/marmgroup/evolution_of_learning).

680

## 681 **References**

- 682 1. West-Eberhard MJ. Developmental Plasticity and Evolution. Oxford: Oxford University Press;  
683 2003.
- 684 2. Ginsburg S, Jablonka E. The evolution of associative learning: A factor in the Cambrian  
685 explosion. *J Theor Biol.* 2010;266: 11–20. doi:10.1016/j.jtbi.2010.06.017
- 686 3. Ginsburg S, Jablonka E. Epigenetic learning in non-neural organisms. *J Biosci.* 2009;34: 633–  
687 646. doi:10.1007/s12038-009-0081-8
- 688 4. Corning WC, Dyal JA, Willows AOD, editors. *Invertebrate Learning*. New York: Springer-  
689 Verlag; 1012.
- 690 5. Papini M. Evolution of learning. In: Seel N, editor. *Encyclopedia of the Sciences of Learning*.



- 691 Springer; 2012. pp. 1188–1192.
- 692 6. Dunlap AS, Austin MW, Figueiredo A. Components of change and the evolution of learning in  
693 theory and experiment. *Anim Behav.* 2019;147: 157–166. doi:10.1016/j.anbehav.2018.05.024
- 694 7. Fawcett TW, Hamblin S, Giraldeau LA. Exposing the behavioral gambit: The evolution of  
695 learning and decision rules. *Behav Ecol.* 2013;24: 2–11. doi:10.1093/beheco/ars085
- 696 8. Borenstein E, Feldman MW, Aoki K. Evolution of learning in fluctuating environments: When  
697 selection favors both social and exploratory individual learning. *Evolution (N Y).* 2008;62:  
698 586–602. doi:10.1111/j.1558-5646.2007.00313.x
- 699 9. Dubois F, Morand-Ferron J, Giraldeau L. Learning in a game context : strategy choice by some  
700 keeps learning from evolving in others. *Proc R Soc B Biol Sci.* 2010; 3609–3616.  
701 doi:10.1098/rspb.2010.0857
- 702 10. Aoki K, Feldman MW. Evolution of learning strategies in temporally and spatially variable  
703 environments: A review of theory. *Theor Popul Biol.* 2014;91: 3–19.  
704 doi:10.1016/j.tpb.2013.10.004
- 705 11. Dridi S, Lehmann L. A model for the evolution of reinforcement learning in fluctuating games.  
706 *Anim Behav.* 2015;104: 87–114. doi:10.1016/j.anbehav.2015.01.037
- 707 12. Dridi S, Lehmann L. On learning dynamics underlying the evolution of learning rules. *Theor*  
708 *Popul Biol.* 2014;91: 20–36. doi:10.1016/j.tpb.2013.09.003
- 709 13. Groß R, Houston AI, Collins EJ, Mcnamara JM, Franks NR. Simple learning rules to cope with  
710 changing environments. *J R Soc Interface.* 2008;5: 1193–1202. doi:10.1098/rsif.2007.1348
- 711 14. Méndez Salinas E, Weissing FJ, Kozielska M. Neural network models for the evolution of  
712 associative learning. *bioRxiv.* 2023; 1–31. doi:10.1101/2023.07.21.549996;
- 713 15. Aggarwal CC. *Neural Networks and Deep Learning.* 1st ed. Springer Cham; 2018.  
714 doi:10.1007/978-3-319-94463-0
- 715 16. Chalmers DJ. The evolution of learning: An experiment in genetic connectionism. *Connect*  
716 *Model.* 1991; 81–90. doi:10.1016/b978-1-4832-1448-1.50014-7
- 717 17. Nadeau SE. Neural population dynamics and cognitive function. *Front Hum Neurosci.*  
718 2020;14: 1–21. doi:10.3389/fnhum.2020.00050

- 719 18. Todd PM, Miller G. Exploring Adaptive Agency II: Simulating the Evolution of Associative  
720 Learning. In: Meyer JA; Wilson SW, editor. From Animals to Animats: Proceedings of the  
721 First International Conference on Simulation of Adaptive Behavior. MIT Press; 1991. pp. 306–  
722 315. doi:10.7551/mitpress/3115.003.0042
- 723 19. Nolfi S, Parisi D. Learning to adapt to changing environments in evolving neural networks.  
724 *Adapt Behav.* 1997;5: 75–98. doi:<https://doi.org/10.1177/105971239600500104>
- 725 20. Floreano D, Dürr P, Mattiussi C. Neuroevolution: From architectures to learning. *Evol Intell.*  
726 2008;1: 47–62. doi:10.1007/s12065-007-0002-4
- 727 21. Tonelli P, Mouret JB. On the relationships between generative encodings, regularity, and  
728 learning abilities when evolving plastic artificial neural networks. *PLoS One.* 2013;8.  
729 doi:10.1371/journal.pone.0079138
- 730 22. Wang L, Orchard J. Investigating the evolution of a neuroplasticity network for learning. *IEEE*  
731 *Trans Syst Man, Cybern Syst.* 2019;49: 2131–2143. doi:10.1109/TSMC.2017.2755066
- 732 23. Lukoševičius M, Jaeger H. Reservoir computing approaches to recurrent neural network  
733 training. *Comput Sci Rev.* 2009;3: 127–149. doi:10.1016/j.cosrev.2009.03.005
- 734 24. Seoane LF. Evolutionary aspects of reservoir computing. *Philos Trans R Soc B Biol Sci.*  
735 2019;374. doi:10.1098/rstb.2018.0377
- 736 25. Clark JJ, Hollon NG, Phillips PEM. Pavlovian valuation systems in learning and decision  
737 making. *Curr Opin Neurobiol.* 2012;22: 1054–1061. doi:10.1016/j.conb.2012.06.004
- 738 26. Schultz W. Dopamine reward prediction error coding. *Dialogues Clin Neurosci.* 2016; 23–32.
- 739 27. Kerr B, Feldman MW. Carving the cognitive niche: Optimal learning strategies in  
740 homogeneous and heterogeneous environments. *J Theor Biol.* 2003;220: 169–188.  
741 doi:10.1006/jtbi.2003.3146
- 742 28. Eliassen S, Jørgensen C, Mangel M, Giske J. Exploration or exploitation : life expectancy  
743 changes the value of learning in foraging strategies. *Oikos.* 2007; 513–523.  
744 doi:10.1111/j.2007.0030-1299.15462.x
- 745 29. Liedtke J, Fromhage L. Need for speed: Short lifespan selects for increased learning ability. *Sci*  
746 *Rep.* 2019;9: 1–6. doi:10.1038/s41598-019-51652-5

- 747 30. Enquist M, Ghirlanda S. *Neural Networks & Animal Behaviour*. Princeton and Oxford:  
748 Princeton University Press; 2005.
- 749 31. Roesch MR, Esber GR, Li J, Daw ND, Schoenbaum G. Surprise! Neural correlates of Pearce-  
750 Hall and Rescorla-Wagner coexist within the brain. *Eur J Neurosci*. 2012;35: 1190–1200.  
751 doi:10.1111/j.1460-9568.2011.07986.x
- 752 32. Rescorla RA. Contemporary study of Pavlovian conditioning. *Span J Psychol*. 2003;6: 185–  
753 195. doi:10.1017/S1138741600005333
- 754 33. Botero CA, Weissing FJ, Wright J, Rubenstein DR. Evolutionary tipping points in the capacity  
755 to adapt to environmental change. *Proc Natl Acad Sci*. 2014;112: 184–189.  
756 doi:10.1073/pnas.1408589111
- 757 34. Eliassen S, Jørgensen C, Mangel M, Giske J. Quantifying the adaptive value of learning in  
758 foraging behavior. *Am Nat*. 2009;174: 478–489. doi:10.1086/605370
- 759 35. Rendell L, Fogarty L, Laland KN. Rogers’ paradox recast and resolved: Population structure  
760 and the evolution of social learning strategies. *Evolution (N Y)*. 2010;64: 534–548.  
761 doi:10.1111/j.1558-5646.2009.00817.x
- 762 36. Fawcett TW, Mallpress DEW, Fallenstein B, McNamara JM, Trimmer PC, Higginson AD, et  
763 al. The evolution of decision rules in complex environments. *Trends Cogn Sci*. 2014;18: 153–  
764 161. doi:10.1016/j.tics.2013.12.012
- 765 37. McNamara JM, Houston AI. Optimal foraging and learning. *J Theor Biol*. 1985;117: 231–249.  
766 doi:10.1016/S0022-5193(85)80219-8
- 767 38. McNamara JM, Houston AI. Memory and the efficient use of information. *J Theor Biol*.  
768 1987;125: 385–395. doi:10.1016/S0022-5193(87)80209-6
- 769 39. Kriegeskorte N, Golan T. Neural network models and deep learning - a primer for biologists.  
770 *Curr Biol*. 2019;29: R231–R236. doi:10.1016/j.cub.2019.02.034
- 771 40. Nolfi S, Floreano D. Learning and evolution. *Auton Robots*. 1999;7: 89–113.  
772 doi:10.1023/A:1008973931182
- 773 41. Ackley D, Littman M. Interactions Between Learning and Evolution. In: Langton CG, Taylor  
774 C, Farmer CD, Rasmussen S, editors. *Artificial Life II*, SFI Studies in the Sciences of

- 775 Complexity. 1992. pp. 487–509.
- 776 42. Mery F, Burns JG. Behavioural plasticity: An interaction between evolution and experience.  
777 *Evol Ecol.* 2010;24: 571–583. doi:10.1007/s10682-009-9336-y
- 778 43. Gupte PR, Netz CFG, Weissing FJ. The joint evolution of movement and competition  
779 strategies. *Am Nat.* 2023;Forthcomin. doi:10.1086/725394
- 780 44. Dukas R. Evolutionary biology of insect learning. *Annu Rev Entomol.* 2008;53: 145–160.  
781 doi:10.1146/annurev.ento.53.103106.093343
- 782 45. Kawecki TJ. Evolutionary ecology of learning: Insights from fruit flies. *Popul Ecol.* 2010;52:  
783 15–25. doi:10.1007/s10144-009-0174-0
- 784 46. Dunlap AS, Stephens DW. Reliability, uncertainty, and costs in the evolution of animal  
785 learning. *Curr Opin Behav Sci.* 2016;12: 73–79. doi:10.1016/j.cobeha.2016.09.010
- 786 47. Johnston TD. Selective costs and benefits in the evolution of learning. *Advances in the Study*  
787 *of Behavior.* 1982. doi:10.1016/S0065-3454(08)60046-7
- 788 48. Lehmann L, Wakano JY, Aoki K. On optimal learning schedules and the marginal value of  
789 cumulative cultural evolution. *Evolution (N Y).* 2013;67: 1435–1445. doi:10.1111/evo.12040
- 790 49. Tierney AL, Nelson CA. Brain development and the role of experience in the early years. *Zero*  
791 *Three.* 2009;30: 9–13.
- 792 50. Katsnelson E, Motro U, Feldman MW, Lotem A. Evolution of learned strategy choice in a  
793 frequency-dependent game. *Proc R Soc B Biol Sci.* 2012;279: 1176–1184.  
794 doi:10.1098/rspb.2011.1734
- 795 51. Dridi S, Lehmann L. Environmental complexity favors the evolution of learning. *Behav Ecol.*  
796 2016;27: 842–850. doi:10.1093/beheco/arv184
- 797 52. Huse G, Strand E, Giske J. Implementing behaviour in individual-based models using neural  
798 networks and genetic algorithms. *Evol Ecol.* 1999;13: 469–483.  
799 doi:10.1023/A:1006746727151
- 800 53. Lukoševičius M, Jaeger H, Schrauwen B. Reservoir computing trends. *KI - Künstliche*  
801 *Intelligenz.* 2012;26: 365–371. doi:10.1007/s13218-012-0204-5
- 802 54. Ellefsen KO, Mouret JB, Clune J. Neural modularity helps organisms evolve to learn new skills

803 without forgetting old skills. PLoS Comput Biol. 2015;11: 1–24.

804 doi:10.1371/journal.pcbi.1004128
